# Supplementary material for: Biopreservation of Wild Edible Mushrooms (Boletus edulis, Cantharellus, and Rozites caperata) with Lactic Acid Bacteria Possessing Antimicrobial Properties
Source: MDPI journal article supplement (doi:10.3390/foods11121800), 2022-06-18
Supplement: s1 [file s1]

Supplementary materials include the following:

Total pages: 10; total tables: 3;

**Table S1** Mushrooms volatile compound (VC) profile.

**Table S2** Correlations and their significance between the volatile compounds and overall acceptability of thermally treated and ultrasonicated unfermented mushrooms and between volatile compounds and the emotion 'happy'.

**Table S3** Correlations and their significance between the volatile compounds and overall acceptability of thermally treated and ultrasonicated fermented mushrooms and between volatile compounds and the emotion 'happy'.

**Table S1.** Volatile compound (VC) profile (RT – retention time; BE - *Boletus edulis*; Ca – *Cantharellus*; Ro - *Rozites caperata*; VC – volatile compound; LUHS245 – fermented with *L. uvarum* LUHS245 strain; thermal – thermal treated by boiling 30 min; ultrasound – ultrasonicated for 30 min. Data are represented as means (n = 3, replicates of analysis).

| RT, min | VC                                       | BE<br>- nontreated | Ca<br>- nontreated | Ro<br>- nontreated | BE-<br>thermal | Ca-<br>thermal | Ro-<br>thermal | BE-<br>ultrasound | Ca-<br>ultrasound | Ro-<br>ultrasound | BE-<br>thermal-<br>LUHS245 | Ca-<br>thermal-<br>LUHS245 | Ro-<br>thermal-<br>LUHS245 | BE-<br>ultrasound-<br>LUHS245 | Ca-<br>ultrasound-<br>LUHS245 | Ro-<br>ultrasound-<br>LUHS245 |
|---------|------------------------------------------|--------------------|--------------------|--------------------|----------------|----------------|----------------|-------------------|-------------------|-------------------|----------------------------|----------------------------|----------------------------|-------------------------------|-------------------------------|-------------------------------|
| 2,375   | Acetic acid                              | 0                  | 0                  | 0                  | 0              | 0              | 0              | 0                 | 0                 | 0                 | 0                          | 0                          | 2,322                      | 0                             | 0                             | 0                             |
| 3,024   | 3-methyl-butanol                         | 0,572              | 0                  | 0,487              | 0              | 0              | 0              | 0                 | 0                 | 0                 | 0                          | 0                          | 0                          | 0                             | 0                             | 0                             |
| 3,779   | Acetoin                                  | 0                  | 0                  | 0                  | 0              | 0              | 0              | 0                 | 0                 | 0                 | 0                          | 14,84                      | 2,684                      | 2,763                         | 0                             | 0                             |
| 4,355   | 3-methyl-1-butanol                       | 0,567              | 0                  | 0                  | 0              | 0              | 0              | 0                 | 0                 | 0                 | 0                          | 12,98                      | 0                          | 18,12                         | 1,856                         | 6,981                         |
| 5,277   | 2,3-Butanediol                           | 0                  | 0                  | 0                  | 0              | 0              | 0              | 0                 | 0                 | 0                 | 0                          | 0                          | 0                          | 3,727                         | 0                             | 0                             |
| 5,763   | Hexanal                                  | 0                  | 1,886              | 0,445              | 0,922          | 5,323          | 0,986          | 0                 | 3,461             | 0,618             | 0                          | 0                          | 16,84                      | 0                             | 3,164                         | 1,689                         |
| 6,401   | 1,3-Octadiene                            | 0                  | 0,299              | 0                  | 0              | 0,91           | 0              | 0                 | 0,463             | 0                 | 0                          | 0                          | 0                          | 0                             | 0                             | 0                             |
| 6,915   | 2-Butenoic acid ethyl ester              | 0                  | 0                  | 0                  | 0              | 0              | 0              | 0                 | 0                 | 0                 | 0                          | 0                          | 0                          | 0                             | 0                             | 0,241                         |
| 7,164   | 3-methyl-butanolic acid ethyl ester      | 0                  | 0                  | 0                  | 0              | 0              | 0              | 0                 | 0                 | 0                 | 0                          | 0                          | 0                          | 0                             | 0                             | 2,123                         |
| 7,567   | 1-Hexanol                                | 0                  | 0                  | 0                  | 0              | 0              | 0,257          | 0                 | 0                 | 0                 | 0                          | 0                          | 1,094                      | 0                             | 2,715                         | 5,078                         |
| 8,11    | 2-Heptanone                              | 0                  | 0                  | 0                  | 1,047          | 0              | 0              | 0                 | 0                 | 0                 | 1,833                      | 0                          | 0                          | 0                             | 0                             | 0,312                         |
| 8,424   | Heptanal                                 | 0                  | 0                  | 0                  | 2,061          | 0,357          | 0              | 1,895             | 0,323             | 0                 | 0                          | 0                          | 0                          | 0                             | 0                             | 0                             |
| 9,451   | Ethyl tiglate                            | 0                  | 0                  | 0                  | 0              | 0              | 0              | 0                 | 0                 | 0                 | 0                          | 3,308                      | 0                          | 2,899                         | 0                             | 14,1                          |
| 9,631   | 2,7-dimethyl-4,5-octanediol              | 0                  | 0                  | 0                  | 0              | 0              | 0              | 0                 | 0                 | 0                 | 0                          | 1,457                      | 0                          | 0                             | 0                             | 0                             |
| 9,862   | 1-methyl-2-(3-methylpentyl)-cyclopropane | 0                  | 0                  | 0                  | 0              | 0              | 0              | 0                 | 0                 | 0                 | 0                          | 0                          | 0                          | 0                             | 0                             | 0,034                         |
| 9,865   | 2-Heptenal                               | 0                  | 0,209              | 0                  | 0              | 0,554          | 0              | 0                 | 0,394             | 0                 | 0                          | 0,545                      | 9,017                      | 0                             | 0,456                         | 0                             |
| 9,949   | Benzaldehyde                             | 0,538              | 1,267              | 35,6               | 4,527          | 1,965          | 44,45          | 1,528             | 2,224             | 51,6              | 4,668                      | 1,646                      | 0                          | 0                             | 1,746                         | 6,316                         |
| 10,244  | Heptyl formate                           | 0                  | 0                  | 0                  | 0              | 0              | 0              | 0                 | 0                 | 0                 | 0                          | 0                          | 0                          | 0                             | 1,113                         | 0                             |
| 10,368  | Isopropyl tiglate                        | 0                  | 0                  | 0                  | 0              | 0              | 0              | 0                 | 0                 | 0                 | 0                          | 0                          | 0                          | 0                             | 0                             | 0,746                         |
| 10,493  | 1-Octen-3-ol                             | 61,86              | 55,22              | 50,4               | 57,87          | 51,13          | 35,87          | 63,63             | 50,92             | 31,74             | 52,72                      | 22,21                      | 7,304                      | 26,76                         | 36,47                         | 11,1                          |
| 10,584  | 2,5-Octanedione                          | 0                  | 0                  | 0                  | 0              | 0              | 0              | 0                 | 0                 | 0                 | 0                          | 0                          | 3,394                      | 0                             | 0                             | 0                             |
| 10,669  | 3-Octanone                               | 5,621              | 0                  | 1,814              | 0              | 0              | 4,568          | 0                 | 0                 | 4,351             | 0                          | 7,32                       | 0                          | 26,4                          | 12,79                         | 12,5                          |
| 10,812  | 2-pentylfuran                            | 0                  | 0                  | 0                  | 0              | 0,12           | 0              | 0                 | 0,065             | 0                 | 0                          | 7,093                      | 3,528                      | 0                             | 0                             | 0                             |
| 10,885  | 3-Octanol                                | 8,814              | 0,525              | 3,713              | 7,003          | 1,287          | 6,082          | 0                 | 0,602             | 4,201             | 0                          | 0                          | 3,258                      | 9,115                         | 7,463                         | 5,46                          |

|        |                                   |       |       |       |       |       |       |       |       |       |       |       |       |       |       |       |
|--------|-----------------------------------|-------|-------|-------|-------|-------|-------|-------|-------|-------|-------|-------|-------|-------|-------|-------|
| 10,988 | Hexanoic acid ethyl ester         | 0     | 0     | 0     | 0     | 0     | 0     | 0     | 0     | 0     | 0     | 0     | 0     | 0     | 0     | 5,235 |
| 11,091 | Octanal                           | 5,474 | 0,367 | 1,34  | 1,267 | 0,651 | 1,513 | 1,35  | 0,436 | 1,49  | 1,501 | 0     | 2,819 | 0     | 1,716 | 0     |
| 11,145 | $\alpha$ -Phellandrene            | 0     | 0     | 0     | 0,626 | 0     | 0     | 0     | 0     | 0     | 0     | 0     | 0     | 0     | 0     | 0     |
| 11,344 | Acetic acid hexyl ester           | 0     | 0     | 0     | 0     | 0     | 0     | 0     | 0     | 0     | 0     | 0     | 0     | 0     | 0     | 0,071 |
| 11,673 | p-Cymene                          | 0     | 0     | 0     | 0,955 | 0     | 0     | 1,482 | 0     | 0     | 0,961 | 0,105 | 0     | 0     | 0,079 | 0,031 |
| 11,788 | Limonene                          | 0,052 | 0     | 0,065 | 3,55  | 0     | 0     | 4,595 | 0     | 0,409 | 3,642 | 0,587 | 0     | 0,151 | 0     | 0,188 |
| 11,844 | 3-ethyl-2-methyl-1,3-hexadiene    | 0     | 1,816 | 0     | 0     | 2,795 | 0     | 0     | 3,1   | 0     | 0     | 0     | 2,034 | 0     | 3,316 | 0     |
| 11,883 | Benzyl alcohol                    | 0     | 0     | 0,071 | 0     | 0     | 0     | 0     | 0     | 0     | 0     | 0     | 0     | 0     | 0     | 3,108 |
| 11,995 | 3-Octen-2-one                     | 0     | 0     | 0     | 0     | 0,577 | 0,054 | 0     | 0     | 0,058 | 0     | 0     | 0,757 | 0     | 0     | 0     |
| 12,04  | 2-(1-pentenyl)furan               | 0     | 0     | 0     | 0     | 0     | 0     | 0     | 0     | 0     | 0     | 0,724 | 0     | 0     | 0     | 0     |
| 12,133 | Benzeneacetaldehyde               | 1,754 | 0     | 0     | 0     | 0     | 0     | 0,536 | 0     | 0     | 0     | 0     | 0     | 0     | 0     | 0     |
| 12,172 | 1-ethyl-1-methyl-cyclopentane     | 0     | 0,716 | 0     | 0     | 0     | 0     | 0     | 0     | 0     | 0     | 0     | 0     | 0     | 0     | 0     |
| 12,195 | Sulfurous acid dicyclohexyl ester | 0     | 0     | 0,133 | 0     | 0     | 0     | 0     | 0     | 0     | 0     | 0     | 0     | 0     | 0     | 0     |
| 12,227 | 4,6-dimethyl-2-heptanone          | 0     | 0     | 0     | 0     | 0     | 0     | 0     | 0     | 0     | 0     | 0     | 0     | 0     | 0     | 0,673 |
| 12,476 | Oct-(2E)-enal                     | 4,551 | 16,34 | 2,247 | 3,157 | 22,2  | 2,207 | 4,445 | 20,72 | 2,504 | 4,32  | 1,518 | 9,941 | 0,32  | 7,662 | 2,056 |
| 12,728 | (E)-2-octen-1-ol                  | 0     | 16,91 | 1,129 | 9,847 | 4,538 | 0,519 | 11,99 | 11,28 | 0,213 | 9,622 | 3,584 | 4,228 | 0     | 1,984 | 2,996 |
| 12,788 | 1-Octanol                         | 8,01  | 0     | 0     | 0     | 0     | 0     | 0     | 0     | 0     | 0     | 0     | 0     | 2,526 | 11,55 | 0     |
| 12,953 | (5-Ethylcyclopent-1-enyl)methanol | 0     | 0     | 0     | 0     | 0     | 0     | 0     | 0     | 0     | 0     | 0     | 0     | 0     | 0,155 | 0     |
| 13,01  | 3-ethyl-2,5-dimethylpyrazine      | 0     | 0     | 0     | 0     | 0     | 0     | 0     | 0     | 0     | 0     | 0     | 0     | 0,296 | 0     | 0     |
| 13,011 | 1-Nonen-3-ol                      | 0     | 0,011 | 0     | 0     | 0     | 0     | 0     | 0     | 0     | 0     | 0     | 0     | 0     | 0     | 0     |
| 13,089 | 5-Nonen-2-one                     | 0     | 0     | 0     | 0     | 0     | 0     | 0     | 0     | 0     | 0     | 0,444 | 0     | 0     | 0     | 0     |
| 13,119 | 1-Adamantanol                     | 0     | 0     | 0     | 0,314 | 0     | 0     | 0,43  | 0     | 0     | 0,596 | 0     | 0     | 0     | 0     | 0     |
| 13,267 | 2-iodo-3-methyl-butane            | 0     | 0     | 0     | 0     | 0     | 0     | 0     | 0     | 0     | 0     | 0     | 0     | 1,071 | 0     | 0     |
| 13,314 | 2-Nonanone                        | 0     | 0     | 0     | 0     | 0     | 0     | 0     | 0     | 0     | 4,138 | 4,969 | 4,162 | 0     | 0     | 4,983 |
| 13,341 | 6-Methyl-hept-2-en-4-ol           | 0     | 0,543 | 0     | 0     | 1,399 | 0     | 0     | 0,877 | 0     | 0     | 0     | 0     | 0     | 0     | 0     |
| 13,518 | 2-Nonanol                         | 0     | 0     | 0     | 0     | 0     | 0     | 0     | 0     | 0     | 0     | 0     | 0,689 | 0,393 | 0     | 0     |
| 13,612 | Nonanal                           | 0,286 | 0,453 | 0,3   | 1,157 | 0,907 | 0,962 | 1,476 | 0,641 | 0,718 | 1,438 | 1,097 | 4,389 | 0     | 0,642 | 0,918 |

[illegible]

|        |                                                                    |       |       |       |       |       |       |       |       |       |       |       |       |       |       |       |
|--------|--------------------------------------------------------------------|-------|-------|-------|-------|-------|-------|-------|-------|-------|-------|-------|-------|-------|-------|-------|
| 16,416 | 2,6,6-trimethyl-1-cyclohexene-1-carboxaldehyde                     | 0     | 0     | 0     | 0     | 0,382 | 0     | 0     | 0,414 | 0     | 0     | 1,257 | 0     | 0     | 0,37  | 0     |
| 16,49  | Benzothiazole                                                      | 0     | 0,029 | 0     | 0     | 0     | 0,016 | 0     | 0,022 | 0,034 | 0     | 0     | 0     | 0     | 0,051 | 0     |
| 16,655 | 2-methylbutanoic acid hexyl ester                                  | 0     | 0     | 0     | 0     | 0     | 0     | 0     | 0     | 0     | 0     | 0     | 0     | 0     | 0     | 0,109 |
| 16,731 | Heptylidene acetone                                                | 0     | 0     | 0     | 0,663 | 0     | 0     | 1,067 | 0     | 0     | 0,576 | 0     | 0     | 0,062 | 0     | 0     |
| 16,991 | Isopentyl hexanoate                                                | 0     | 0     | 0     | 0     | 0     | 0     | 0     | 0     | 0     | 0     | 0     | 0     | 0     | 0     | 0,095 |
| 17,066 | β-Ethylphenethyl alcohol                                           | 0,04  | 0     | 0     | 0     | 0     | 0     | 0     | 0     | 0     | 0     | 0     | 0     | 0,093 | 0     | 0     |
| 17,099 | 1,3-bis(1,1-dimethylethyl)benzene                                  | 0     | 0     | 0,039 | 0,258 | 0,095 | 0,071 | 0,165 | 0,05  | 0,071 | 0,472 | 0,218 | 0,14  | 0     | 0,085 | 0     |
| 17,206 | Dec-(2E)-enal                                                      | 0,027 | 0,06  | 0,035 | 0     | 0,087 | 0,125 | 0     | 0     | 0,096 | 0     | 0     | 1,661 | 0     | 0     | 0,276 |
| 17,255 | 2,6,6-trimethyl-1-cyclohexene-1-acetaldehyde                       | 0     | 0     | 0     | 0     | 0     | 0     | 0     | 0,127 | 0     | 0     | 0     | 0     | 0     | 0     | 0     |
| 17,275 | Vinyl caprylate                                                    | 0     | 0     | 0     | 0     | 0     | 0     | 0     | 0     | 0     | 0     | 0     | 0     | 0     | 0     | 0,238 |
| 17,293 | Nonanoic acid                                                      | 0,315 | 0,223 | 0,277 | 0,828 | 0,477 | 0,195 | 0,804 | 0,135 | 0,128 | 2,373 | 3,409 | 1,96  | 0,17  | 0,3   | 0     |
| 17,415 | Dipentyl ketone                                                    | 0     | 0     | 0     | 0     | 0     | 0     | 0     | 0     | 0     | 0     | 0     | 0     | 0     | 0     | 0,292 |
| 17,432 | 1-Decanol                                                          | 0     | 0     | 0     | 0     | 0     | 0     | 0     | 0     | 0     | 0     | 0     | 0     | 0,083 | 0     | 0     |
| 17,502 | 2-phenyl-crotonaldehyde                                            | 0,382 | 0     | 0,022 | 0,188 | 0     | 0,027 | 0,233 | 0     | 0,035 | 0,206 | 0     | 0     | 0     | 0     | 0     |
| 17,545 | (Z)-3-Octen-1-ol acetate                                           | 0     | 0     | 0     | 0     | 0     | 0     | 0     | 0     | 0     | 0     | 0,18  | 0     | 0     | 0     | 0     |
| 17,585 | 2,2,4,15,17,17-hexamethyl-7,12-bis(3,5,5-trimethylhexyl)octadecane | 0     | 0,119 | 0     | 0     | 0     | 0     | 0     | 0     | 0     | 0     | 0     | 0     | 0     | 0     | 0     |
| 17,605 | 2,2,4,10,12,12-hexamethyl-7-(3,5,5-trimethylhexyl)-6-Tridecene     | 0     | 0     | 0     | 0     | 0,08  | 0     | 0     | 0,095 | 0     | 0     | 0     | 0     | 0     | 0     | 0     |
| 17,614 | 4,6-dimethyldodecane                                               | 0,021 | 0     | 0     | 0,101 | 0     | 0,038 | 0,121 | 0     | 0,017 | 0,129 | 0     | 0     | 0     | 0     | 0     |
| 17,617 | 5-methyl-2-(1-methylethyl)-1-hexanol                               | 0,023 | 0     | 0     | 0     | 0     | 0     | 0     | 0     | 0     | 0     | 0     | 0     | 0     | 0     | 0,108 |
| 17,619 | 2,6,10-trimethyldodecane                                           | 0     | 0     | 0     | 0     | 0     | 0     | 0     | 0     | 0     | 0     | 0,328 | 0     | 0     | 0     | 0     |
| 17,888 | 2-Undecanone                                                       | 0,054 | 0     | 0,26  | 0     | 0,297 | 0,511 | 0,67  | 0,264 | 0,476 | 5,09  | 1,14  | 4,621 | 0,25  | 0,574 | 3,438 |
| 17,96  | Indole                                                             | 0     | 0     | 0,016 | 0     | 0     | 0,017 | 0     | 0     | 0,024 | 0     | 0     | 0     | 0     | 0     | 0     |
| 18,017 | Methyl nonyl carbinol                                              | 0     | 0     | 0,049 | 0     | 0     | 0,038 | 0     | 0     | 0,041 | 0     | 0     | 0,356 | 0,063 | 0     | 0,495 |
| 18,18  | Undecanal                                                          | 0,016 | 0,014 | 0     | 0     | 0     | 0,028 | 0     | 0,013 | 0,027 | 0     | 0     | 0,06  | 0     | 0     | 0     |

|        |                                                                                 |       |       |       |       |       |       |       |       |       |       |       |       |       |       |       |
|--------|---------------------------------------------------------------------------------|-------|-------|-------|-------|-------|-------|-------|-------|-------|-------|-------|-------|-------|-------|-------|
| 18,376 | Deca-(2E,4E)-dienal                                                             | 0,032 | 0,215 | 0,074 | 0,116 | 0,211 | 0,289 | 0     | 0,215 | 0,179 | 0     | 0     | 1,126 | 0,02  | 0,215 | 0,287 |
| 18,663 | Methyl 8-oxooctanoate                                                           | 0     | 0,019 | 0     | 0     | 0     | 0     | 0     | 0,023 | 0     | 0     | 0     | 0     | 0     | 0     | 0,148 |
| 18,706 | 3-[(1Z)-1,3-Butadienyl]-4-vinylcyclopentene                                     | 0     | 0     | 0     | 0     | 0     | 0     | 0     | 0     | 0     | 0     | 0,156 | 0     | 0     | 0     | 0     |
| 19,203 | Propanoic acid, 2-methyl-, 2,2-dimethyl-1-(2-hydroxy-1-methylethyl)propyl ester | 0     | 0,009 | 0,032 | 0,331 | 0     | 0     | 0,278 | 0     | 0     | 0,189 | 0     | 0     | 0,038 | 0     | 0     |
| 19,288 | n-Decanoic acid                                                                 | 0,032 | 0     | 0,03  | 0     | 0     | 0     | 0     | 0     | 0     | 0,22  | 0     | 0,299 | 0     | 0     | 0     |
| 19,334 | 2-Undecenal                                                                     | 0     | 0,092 | 0     | 0     | 0,115 | 0,105 | 0     | 0,097 | 0,092 | 0     | 0     | 0,992 | 0     | 0,21  | 0     |
| 19,359 | 5-heptyldihydro-2(3H)-furanone                                                  | 0,056 | 0     | 0     | 0     | 0     | 0     | 0     | 0     | 0     | 0     | 0     | 0     | 0     | 0     | 0,412 |
| 19,493 | 6-Dodecanone                                                                    | 0     | 0     | 0     | 0     | 0     | 0     | 0     | 0     | 0     | 0     | 0     | 0     | 0     | 0     | 0,249 |
| 19,644 | Propanoic acid, 2-methyl-, 3-hydroxy-2,4,4-trimethylpentyl ester                | 0     | 0     | 0     | 0,385 | 0     | 0     | 0     | 0     | 0     | 0,617 | 0     | 0     | 0     | 0     | 0     |
| 19,656 | trans-4,5-Epoxy-(E)-2-decenal                                                   | 0     | 0,041 | 0     | 0     | 0,134 | 0     | 0     | 0,05  | 0     | 0     | 0     | 1,332 | 0     | 0     | 0     |
| 19,811 | 3-methyl-N-(2-phenylethylidene)-1-butanamine                                    | 0,018 | 0     | 0,976 | 0,179 | 0     | 0,343 | 0     | 0     | 0,074 | 0     | 0     | 0     | 0     | 0,078 | 0,333 |
| 20,044 | Tetradecane                                                                     | 0,022 | 0,019 | 0,011 | 0,117 | 0     | 0,031 | 0,135 | 0     | 0,032 | 0,202 | 0,1   | 0,088 | 0,028 | 0,04  | 0     |
| 20,166 | 2-butyl-1-octanol                                                               | 0     | 0,007 | 0     | 0     | 0     | 0     | 0     | 0     | 0     | 0     | 0     | 0     | 0     | 0     | 0     |
| 20,222 | Isophytol                                                                       | 0     | 0     | 0,021 | 0     | 0     | 0,055 | 0     | 0     | 0     | 0     | 0     | 0     | 0     | 0     | 0,129 |
| 20,363 | 2,4,7,9-Tetramethyl-5-decyn-4,7-diol                                            | 0     | 0     | 0     | 0     | 0     | 0,043 | 0,14  | 0     | 0,023 | 0     | 0,084 | 0,131 | 0     | 0     | 0     |
| 20,704 | 9-oxo-nonanoic acid methyl ester                                                | 0     | 0,051 | 0     | 0     | 0     | 0,018 | 0     | 0,05  | 0,013 | 0     | 0     | 0     | 0     | 0     | 0     |
| 20,813 | Trans-Tetradec-2-enal                                                           | 0     | 0     | 0     | 0     | 0     | 0,032 | 0     | 0     | 0     | 0     | 0     | 0     | 0     | 0     | 0     |
| 20,834 | (Z)-octadec-9-enal                                                              | 0     | 0     | 0     | 0     | 0     | 0     | 0     | 0     | 0     | 0     | 0     | 0,316 | 0     | 0     | 0     |
| 20,932 | 4-(2,6,6-trimethyl-1-cyclohexen-1-yl)-2-butanone,                               | 0     | 0,039 | 0     | 0     | 0     | 0     | 0     | 0     | 0     | 0     | 0     | 0     | 0     | 0     | 0     |
| 21,125 | 6,10-dimethyl-5,9-undecadien-2-one                                              | 0,017 | 0,061 | 0,017 | 0,055 | 0,09  | 0,022 | 0,077 | 0,073 | 0,019 | 0,078 | 0,269 | 0,065 | 0,031 | 0,173 | 0,035 |
| 21,197 | 2-methylpentanoic acid anhydride                                                | 0     | 0     | 0     | 0     | 0     | 0     | 0     | 0,01  | 0     | 0     | 0     | 0     | 0     | 0     | 0     |

|        |                                                          |       |       |       |       |       |       |       |       |       |       |       |       |       |       |       |
|--------|----------------------------------------------------------|-------|-------|-------|-------|-------|-------|-------|-------|-------|-------|-------|-------|-------|-------|-------|
| 21,238 | $\beta$ -Barbatene                                       | 0     | 0     | 0,027 | 0     | 0     | 0,034 | 0     | 0     | 0,054 | 0     | 0     | 0,193 | 0     | 0     | 0     |
| 21,466 | Dodecanol                                                | 0     | 0,035 | 0     | 0     | 0     | 0     | 0     | 0     | 0     | 0     | 0     | 0     | 0     | 0     | 0     |
| 21,48  | 9-Decen-1-yl acetate                                     | 0     | 0     | 0     | 0     | 0     | 0     | 0     | 0     | 0     | 1,275 | 0,209 | 0,596 | 0     | 0     | 0     |
| 21,487 | n-Tridecan-1-ol                                          | 0     | 0     | 0     | 0     | 0     | 0     | 0,06  | 0     | 0     | 0     | 0     | 0     | 0     | 0     | 0     |
| 21,648 | (1-methyl-3-butenyl)benzene                              | 0     | 0     | 0     | 0     | 0     | 0     | 0     | 0     | 0     | 0     | 0     | 0     | 0,092 | 0     | 0     |
| 21,88  | 4-(2,6,6-trimethyl-1-cyclohexen-1-yl)-3-buten-2-one      | 0     | 0,542 | 0     | 0     | 0,742 | 0     | 0     | 0,821 | 0     | 0     | 2,291 | 0     | 0     | 0,725 | 0     |
| 22,052 | Benzyl tiglate                                           | 0     | 0     | 0     | 0     | 0     | 0     | 0     | 0     | 0     | 0     | 0     | 0     | 0     | 0     | 0,077 |
| 22,258 | 2,4-bis(1,1-dimethylethyl)phenol                         | 0,036 | 0,018 | 0     | 0,471 | 0,03  | 0,022 | 0,418 | 0,021 | 0,01  | 0,485 | 0,129 | 0     | 0     | 0     | 0     |
| 22,351 | Butylated Hydroxytoluene                                 | 0     | 0     | 0     | 0     | 0     | 0     | 0     | 0     | 0     | 0,112 | 0     | 0     | 0     | 0     | 0     |
| 22,623 | 4-(1-piperidiny)-2-butanone                              | 0     | 0     | 0     | 0     | 0,147 | 0     | 0     | 0     | 0     | 0     | 0     | 0     | 0     | 0     | 0     |
| 22,751 | Hentriacontane                                           | 0,015 | 0     | 0     | 0     | 0,022 | 0     | 0,106 | 0     | 0     | 0     | 0,128 | 0     | 0     | 0     | 0     |
| 22,819 | 5,6,7,7a-tetrahydro-4,4,7a-trimethyl-2(4H)-Benzofuranone | 0     | 0     | 0     | 0     | 0,028 | 0     | 0     | 0,061 | 0     | 0     | 0,213 | 0     | 0     | 0,038 | 0     |
| 23,051 | Dodecanoic acid                                          | 0,032 | 0     | 0,02  | 0,075 | 0,046 | 0     | 0     | 0     | 0     | 0     | 0     | 1,648 | 0,036 | 0     | 0     |
| 23,676 | 2-Pentylcyclopentanone                                   | 0     | 0     | 0     | 0     | 0     | 0     | 0     | 0     | 0     | 0     | 0     | 0,083 | 0     | 0     | 0     |
| 23,685 | Ethyl dodecanoate                                        | 0     | 0     | 0     | 0     | 0     | 0     | 0     | 0     | 0     | 0     | 0     | 0     | 0,03  | 0     | 0     |

RT – retention time; BE - *Boletus edulis*; Ca – *Cantharellus*; Ro - *Rozites caperata*; VC – volatile compound; LUHS245 – fermented with *L. uvarum* LUHS245 strain; thermal – thermal treated by boiling 30 min; ultrasound – ultrasonicated for 30 min. Data are represented as means (n = 3, replicates of analysis).

**Table S2.** Correlations and their significance between thermal treated and ultrasonicated nonfermented mushrooms volatile compound and overall acceptability and between volatile compound and emotion ‘happy’.

| VC                                                                                                                                                                            | OA                  |                 | Happy               |                 |
|-------------------------------------------------------------------------------------------------------------------------------------------------------------------------------|---------------------|-----------------|---------------------|-----------------|
|                                                                                                                                                                               | Pearson Correlation | Sig. (2-tailed) | Pearson Correlation | Sig. (2-tailed) |
| Hexanal                                                                                                                                                                       | 0.385               | 0.114           | 0.619**             | 0.006           |
| 2-Heptanone                                                                                                                                                                   | -0.101              | 0.690           | -0.088              | 0.728           |
| Heptanal                                                                                                                                                                      | -0.041              | 0.873           | -0.202              | 0.422           |
| Benzaldehyde                                                                                                                                                                  | -0.103              | 0.685           | -0.472*             | 0.048           |
| 1-Octen-3-ol                                                                                                                                                                  | 0.244               | 0.329           | 0.190               | 0.449           |
| 3-Octanone                                                                                                                                                                    | -0.103              | 0.683           | -0.472*             | 0.048           |
| 3-Octanol                                                                                                                                                                     | -0.134              | 0.596           | -0.416              | 0.086           |
| Octanal                                                                                                                                                                       | -0.086              | 0.735           | -0.862**            | 0.0001          |
| p-Cymene                                                                                                                                                                      | -0.088              | 0.728           | -0.358              | 0.145           |
| Limonene                                                                                                                                                                      | -0.099              | 0.695           | -0.380              | 0.120           |
| 3-ethyl-2-methyl-1,3-hexadiene                                                                                                                                                | 0.317               | 0.199           | 0.841**             | 0.0001          |
| Oct-(2E)-enal                                                                                                                                                                 | 0.367               | 0.134           | 0.778**             | 0.0001          |
| (E)-2-octen-1-ol                                                                                                                                                              | 0.082               | 0.747           | 0.457               | 0.057           |
| 6-Methyl-hept-2-en-4-ol                                                                                                                                                       | 0.370               | 0.130           | 0.628**             | 0.005           |
| Nonanal                                                                                                                                                                       | 0.121               | 0.632           | -0.530*             | 0.024           |
| 3,6-Dimethyl-2,3,3a,4,5,7a-hexahydrobenzofuran                                                                                                                                | -0.088              | 0.727           | -0.335              | 0.174           |
| Heptylidene acetone                                                                                                                                                           | -0.082              | 0.747           | -0.358              | 0.144           |
| VC – volatile compound; OA – overall acceptability; * - Correlation is significant at the 0.05 level (2-tailed); * - Correlation is significant at the 0.01 level (2-tailed). |                     |                 |                     |                 |



**Table S3.** Correlations and their significance between thermal treated and ultrasonicated fermented mushrooms volatile compound and overall acceptability and between volatile compound and emotion ‘happy’.

| VC                                                                                                                                                                               | OA                  |                 | Happy               |                 |
|----------------------------------------------------------------------------------------------------------------------------------------------------------------------------------|---------------------|-----------------|---------------------|-----------------|
|                                                                                                                                                                                  | Pearson Correlation | Sig. (2-tailed) | Pearson Correlation | Sig. (2-tailed) |
| Acetic acid                                                                                                                                                                      | -0.245              | 0.328           | -0.204              | 0.418           |
| Acetoin                                                                                                                                                                          | -0.227              | 0.365           | -0.033              | 0.897           |
| 3-methyl-1-butanol                                                                                                                                                               | 0.335               | 0.175           | 0.755**             | 0.0001          |
| 2,3-Butanediol                                                                                                                                                                   | 0.385               | 0.141           | 0.999**             | 0.0001          |
| Hexanal                                                                                                                                                                          | -0.239              | 0.341           | -0.274              | 0.271           |
| 3-methyl-butanoic acid ethyl ester                                                                                                                                               | 0.482               | 0.081           | -0.279              | 0.334           |
| 1-Hexanol                                                                                                                                                                        | 0.379               | 0.121           | -0.359              | 0.143           |
| 2-Heptanone                                                                                                                                                                      | -0.088              | 0.728           | -0.243              | 0.332           |
| Ethyl tiglate                                                                                                                                                                    | 0.464               | 0.053           | -0.045              | 0.860           |
| 2,7-dimethyl-4,5-octanediol                                                                                                                                                      | -0.218              | 0.386           | -0.181              | 0.473           |
| 2-Heptenal                                                                                                                                                                       | -0.268              | 0.282           | -0.229              | 0.360           |
| Benzaldehyde                                                                                                                                                                     | 0.189               | 0.483           | -0.563*             | 0.023           |
| Heptyl formate                                                                                                                                                                   | 0.020               | 0.937           | -0.201              | 0.424           |
| 1-Octen-3-ol                                                                                                                                                                     | -0.078              | 0.758           | 0.020               | 0.937           |
| 2,5-Octanedione                                                                                                                                                                  | -0.245              | 0.328           | -0.204              | 0.418           |
| 3-Octanone                                                                                                                                                                       | 0.543*              | 0.020           | 0.819**             | 0.0001          |
| 2-pentylfuran                                                                                                                                                                    | -0.336              | 0.173           | -0.275              | 0.269           |
| 3-Octanol                                                                                                                                                                        | 0.519*              | 0.027           | 0.622**             | 0.006           |
| Hexanoic acid ethyl ester                                                                                                                                                        | 0.423               | 0.080           | -0.205              | 0.413           |
| Octanal                                                                                                                                                                          | -0.322              | 0.192           | -0.420              | 0.082           |
| Limonene                                                                                                                                                                         | -0.179              | 0.477           | -0.210              | 0.402           |
| 3-ethyl-2-methyl-1,3-hexadiene                                                                                                                                                   | -0.129              | 0.610           | -0.307              | 0.216           |
| Benzyl alcohol                                                                                                                                                                   | 0.425               | 0.079           | -0.205              | 0.414           |
| Oct-(2E)-enal                                                                                                                                                                    | -0.260              | 0.297           | -0.518*             | 0.028           |
| (E)-2-octen-1-ol                                                                                                                                                                 | -0.286              | 0.250           | -0.564*             | 0.015           |
| 1-Octanol                                                                                                                                                                        | 0.076               | 0.766           | 0.017               | 0.946           |
| 2-iodo-3-methyl-butane                                                                                                                                                           | 0.360               | 0.143           | 0.999**             | 0.0001          |
| 2-Nonanone                                                                                                                                                                       | -0.135              | 0.594           | -0.617**            | 0.006           |
| Nonanal                                                                                                                                                                          | -0.314              | 0.205           | -0.452              | 0.060           |
| Phenylethyl Alcohol                                                                                                                                                              | 0.567*              | 0.014           | 0.326               | 0.187           |
| N-hexyl-1-hexanamine                                                                                                                                                             | 0.359               | 0.144           | 0.999**             | 0.0001          |
| (E)-non-2-enal                                                                                                                                                                   | -0.319              | 0.197           | -0.461              | 0.054           |
| 3,6-Dimethyl-2,3,3a,4,5,7a-hexahydrobenzofuran                                                                                                                                   | -0.183              | 0.468           | -0.205              | 0.415           |
| Octanoic acid ethyl ester                                                                                                                                                        | 0.381               | 0.118           | -0.170              | 0.500           |
| (E,E)-2,4-nonadienal                                                                                                                                                             | -0.203              | 0.419           | -0.252              | 0.313           |
| 2,6,6-trimethyl-1-cyclohexene-1-carboxaldehyde                                                                                                                                   | -0.211              | 0.400           | -0.243              | 0.331           |
| Dec-(2E)-enal                                                                                                                                                                    | -0.179              | 0.477           | -0.243              | 0.332           |
| Nonanoic acid                                                                                                                                                                    | -0.459              | 0.055           | -0.401              | 0.099           |
| Deca-(2E,4E)-dienal                                                                                                                                                              | -0.141              | 0.576           | -0.295              | 0.235           |
| trans-4,5-Epoxy-(E)-2-decenal                                                                                                                                                    | -0.246              | 0.324           | -0.204              | 0.418           |
| 9-Decen-1-yl acetate                                                                                                                                                             | -0.337              | 0.171           | -0.335              | 0.175           |
| 4-(2,6,6-trimethyl-1-cyclohexen-1-yl)-3-buten-2-one                                                                                                                              | -0.213              | 0.397           | -0.247              | 0.323           |
| Dodecanoic acid                                                                                                                                                                  | -0.241              | 0.335           | -0.183              | 0.468           |
| VC – volatile compound; OA – overall acceptability; * - Correlation is significant at the 0.05 level (2-tailed);<br>* - Correlation is significant at the 0.01 level (2-tailed). |                     |                 |                     |                 |
